# Supplementary material for: A Novel Route for Preparation of Hollow Carbon Nanospheres Without Introducing Template
Source: Springer Nature journal article supplement (doi:10.1007/s11671-009-9406-7), 2009-08-21
Supplement: MOESM1 [file 11671_2009_9406_MOESM1_ESM.doc]

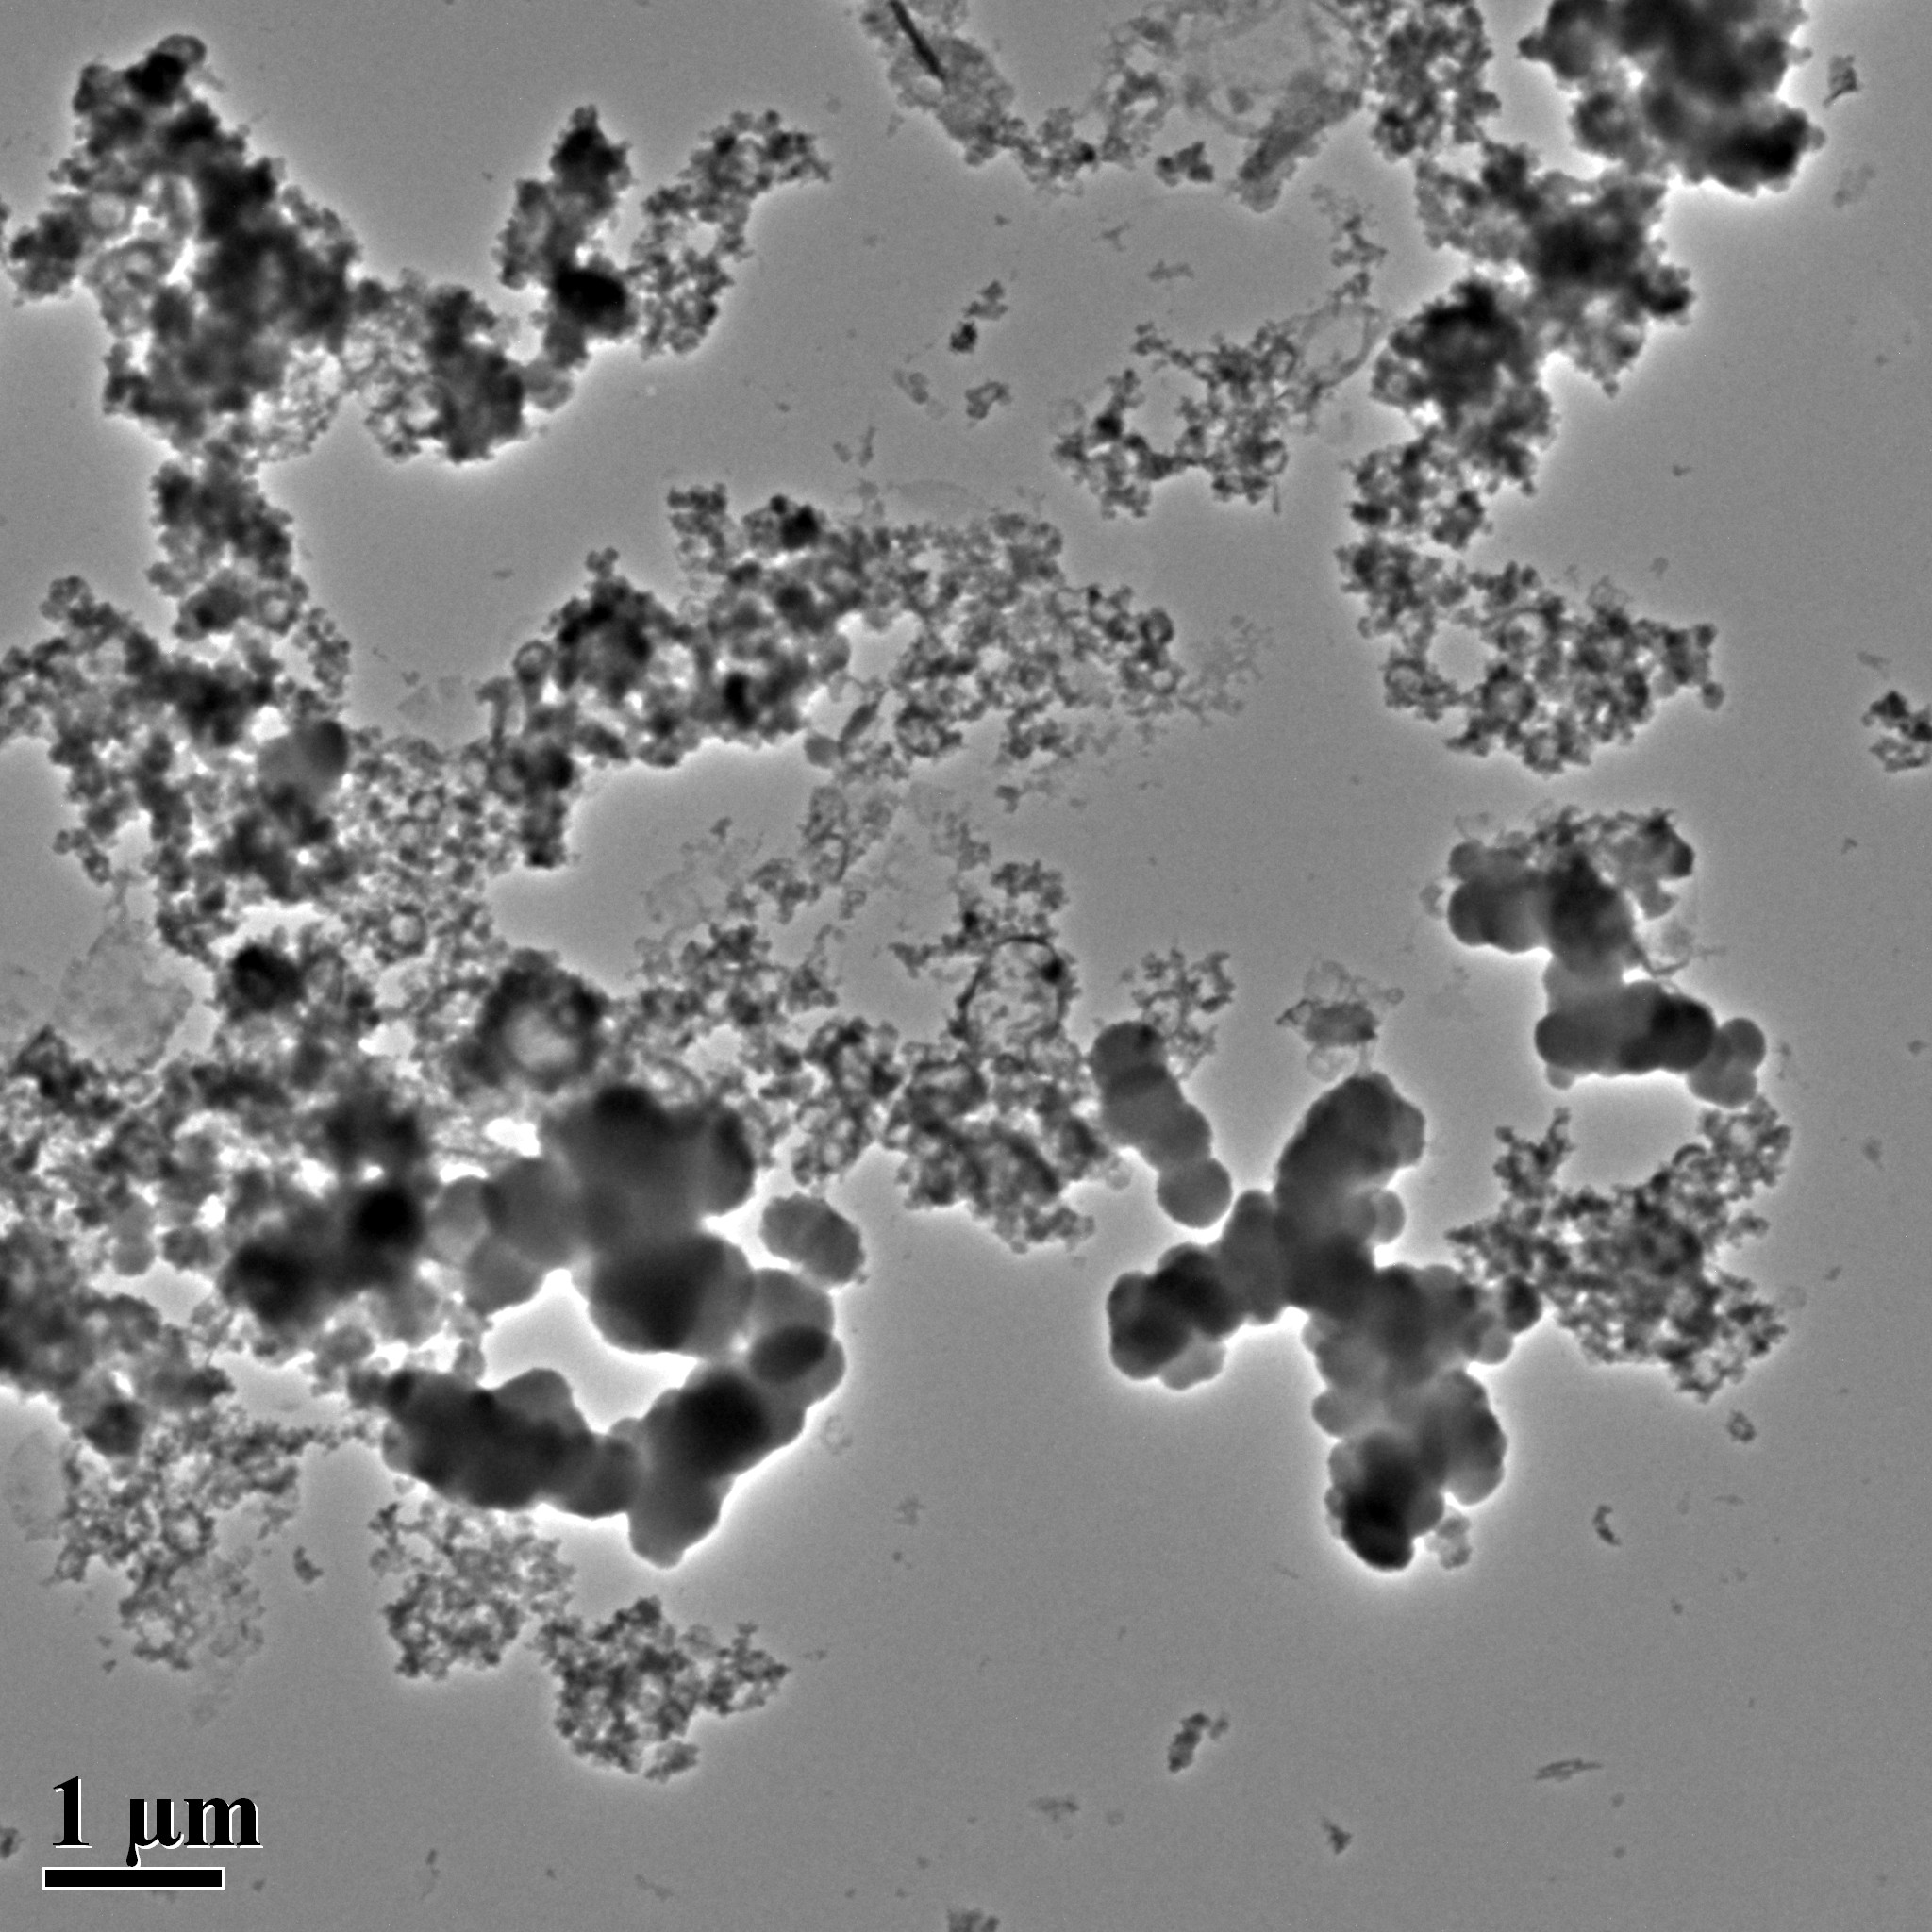


TEM image of carbon particles through hydrothermal process without ultrasonic process


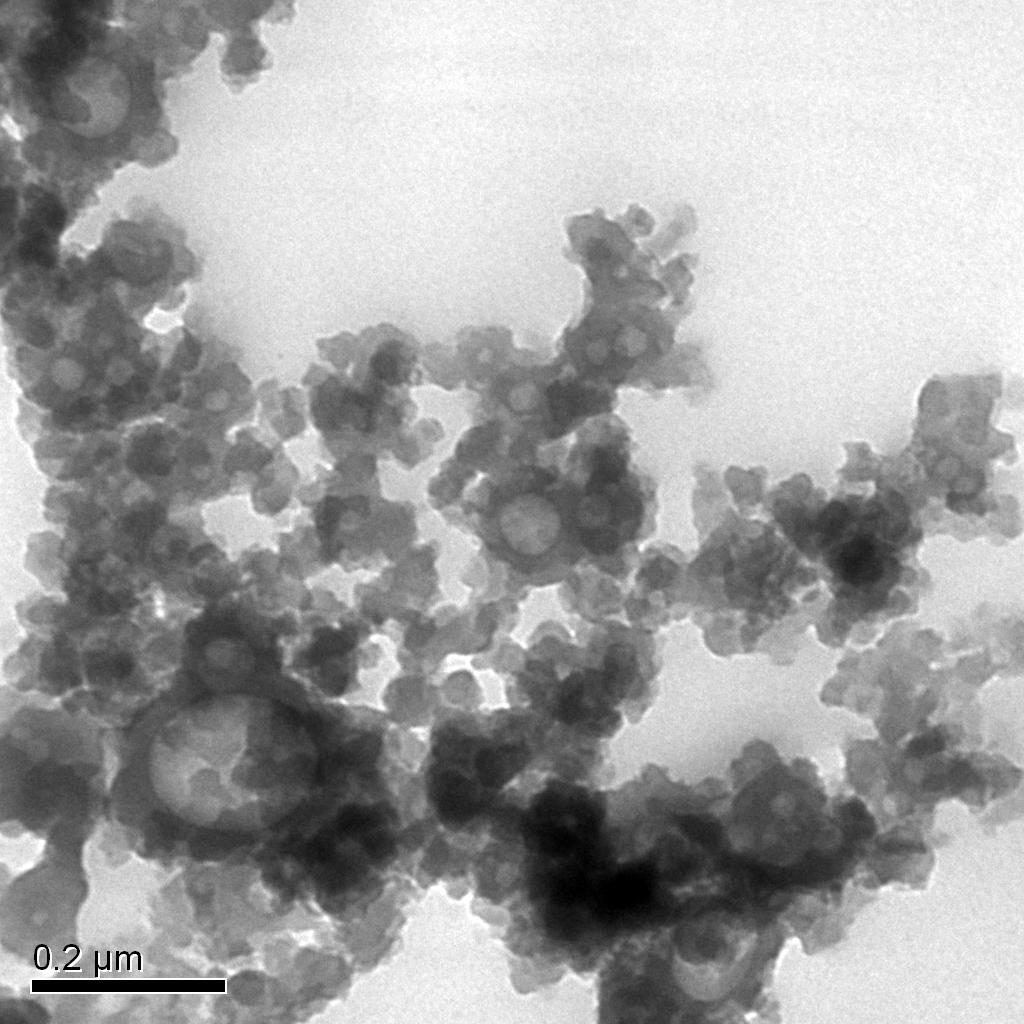


TEM image of hollow carbon nanospheres when the filling ratio of the reagent is low to 40%
